# Supplementary material for: Mid-Term Clinical Outcomes and Hemodynamic Performances of Trifecta and Perimount Bioprostheses following Aortic Valve Replacement
Source: MDPI journal article supplement (doi:10.3390/jcdd10040139), 2023-03-24
Supplement: s1 [file s1]

**Table S1.** Baseline and preoperative echocardiographic characteristics

|                                              | UNWEIGHTED<br>POPULATION<br>(Total 168) |                           |                 | WEIGHTED<br>POPULATION<br>(Total 133) |                           |                 |
|----------------------------------------------|-----------------------------------------|---------------------------|-----------------|---------------------------------------|---------------------------|-----------------|
|                                              | Trifecta<br>n 86                        | Perimount<br>n 82         | <i>p</i> -value | Trifecta<br>n 79                      | Perimount<br>n 54         | <i>p</i> -value |
| Age, (years)*                                | 70.8±8.6                                | 68.8±8.6                  | 0.120           | 70.5±8.5                              | 69.4±7.5                  | 0.931           |
| Male sex*                                    | 63 (73.2)                               | 68 (82.9)                 | 0.141           | 57 (72.1)                             | 43 (79.6)                 | 0.970           |
| BMI (Kg/m <sup>2</sup> )*                    | 26.0±4.2                                | 27.6±4.5                  | <b>0.022</b>    | 26.0±4.1                              | 27.1±4.4                  | 0.826           |
| Hypertension*                                | 62 (72.1)                               | 65 (79.3)                 | 0.288           | 57 (72.1)                             | 42 (77.8)                 | 0.989           |
| Hypercholesterolemia                         | 47 (54.6)                               | 51 (62.2)                 | 0.350           | 43 (54.4)                             | 35 (64.8)                 | 0.449           |
| Smoking*                                     | 33 (38.4)                               | 38 (46.3)                 | 0.349           | 31 (39.2)                             | 23 (42.6)                 | 0.635           |
| Diabetes with insulin treatment*             | 3 (3.5)                                 | 6 (7.3)                   | 0.321           | 3 (3.8)                               | 2 (3.7)                   | 0.739           |
| Peripheral vascular disease*                 | 15 (17.4)                               | 12 (14.6)                 | 0.678           | 12 (15.2)                             | 9 (16.7)                  | 0.997           |
| Chronic lung disease*                        | 8 (9.3)                                 | 11 (13.4)                 | 0.469           | 7 (8.8)                               | 7 (12.9)                  | 0.943           |
| † Chronic kidney disease*                    | ...                                     | ...                       | 0.180           | ...                                   | ...                       | ...             |
| Severely decreased                           | 6 (6.9)                                 | 11 (13.4)                 | ...             | 6 (7.6)                               | 8 (14.8)                  | 0.204           |
| Kidney failure                               | 1 (1.2)                                 | 0 (0.0)                   | ...             | -                                     | -                         | -               |
| NYHA class III-IV*                           | 26 (30.2)                               | 28 (34.1)                 | 0.623           | 24 (30.4)                             | 18 (33.3)                 | 0.732           |
| CCS Angina score class 2-3*                  | 5 (5.8)                                 | 19 (23.2)                 | <b>0.002</b>    | 5 (6.3)                               | 4 (7.4)                   | 0.166           |
| Critical state*                              | 11 (12.8)                               | 8 (9.7)                   | 0.629           | 8 (10.1)                              | 5 (9.3)                   | 0.709           |
| Active endocarditis*                         | 7 (8.1)                                 | 3 (3.7)                   | 0.330           | 5 (6.3)                               | 2 (3.7)                   | 0.434           |
| Previous cardiac surgery*                    | 9 (10.5)                                | 5 (6.1)                   | 0.405           | 8 (10.1)                              | 3 (5.6)                   | 0.339           |
| Recent myocardial infarction*                | 7 (8.1)                                 | 6 (7.3)                   | 1.000           | 5 (6.3)                               | 3 (5.6)                   | 0.622           |
| EuroSCORE-II*                                | 3 (IQR:2-8)<br>(Mean:7±11)              | 3 (IQR:1-6)<br>(Mean:6±9) | 0.553           | 2 (IQR:1.7)<br>(Mean:6±9)             | 3 (IQR:1-5)<br>(Mean:5±6) | 0.445           |
| Urgent timing*                               | 14 (16.3)                               | 11 (13.4)                 | 0.668           | 10 (12.6)                             | 7 (12.9)                  | 0.758           |
| Prevalent aortic valve stenosis*             | 60 (69.7)                               | 56 (68.3)                 | 0.869           | 58 (73.4)                             | 39 (72.2)                 | 0.604           |
| Prevalent aortic valve regurgitation         | 34 (39.5)                               | 37 (45.1)                 | 0.533           | 30 (37.9)                             | 24 (44.4)                 | 0.952           |
| Mean left ventricular ejection fraction (%)* | 53.7±11.9                               | 54.5±10.4                 | 0.994           | 54.3±11.9                             | 54.2±11.1                 | 0.780           |
| Mean aortic valve area (cm <sup>2</sup> )    | 0.8±0.3                                 | 0.9±0.3                   | <b>0.046</b>    | 0.8±0.3                               | 0.9±0.4                   | 0.792           |
| Mean gradient (mmHg)                         | 40.4±15.9                               | 42.3±20.6                 | 0.710           | 41.7±15.2                             | 47.9±19.2                 | <b>0.042</b>    |
| Pulmonary hypertension*                      | 21 (24.4)                               | 18 (21.9)                 | 0.719           | 17 (21.5)                             | 13 (24.1)                 | 0.923           |

Continuous variables are presented as mean  $\pm$  standard deviation or the median and quartile; categoric variables are presented as counts and percentage; p-value is a Student t test or Mann Whitney U test for continuous variables and a Fisher exact test for categorical variables. Abbreviations: BMI=body mass index; NYHA=New York heart association; CCS= Canadian cardiovascular society. † Chronic kidney disease is defined according to the KDIGO CKD Work Group clinical practice guidelines. \*Variables used for propensity score.

**Table S2.** Procedural details

|                                       | UNWEIGHTED<br>POPULATION<br>(Total 168) |                   |              | WEIGHTED<br>POPULATION<br>(Total 133) |                   |              |
|---------------------------------------|-----------------------------------------|-------------------|--------------|---------------------------------------|-------------------|--------------|
|                                       | Trifecta<br>n 86                        | Perimount<br>n 82 | p-value      | Trifecta<br>n 79                      | Perimount<br>n 54 | p-value      |
| <i>Surgical access:</i>               |                                         |                   |              |                                       |                   |              |
| Sternotomy                            | 55 (63.9)                               | 55 (67.1)         | 0.746        | 49 (62.0)                             | 33 (61.1)         | 0.340        |
| Upper mini sternotomy                 | 32 (37.2)                               | 30 (36.6)         | 1.000        | 31 (39.2)                             | 24 (44.4)         | 0.143        |
| Conversion to sternotomy              | 2 (2.3)                                 | 4 (4.9)           | 0.435        | 2 (2.5)                               | 3 (5.6)           | 0.221        |
| Isolated aortic valve replacement     | 39 (45.3)                               | 22 (26.8)         | <b>0.016</b> | 37 (46.8)                             | 21 (38.9)         | 0.545        |
| <i>Combined procedure:</i>            |                                         |                   |              |                                       |                   |              |
| CABG                                  | 18 (20.9)                               | 16 (19.5)         | 0.850        | 17 (21.5)                             | 7 (12.9)          | 0.313        |
| Ascending aorta replacement*          | 6 (6.9)                                 | 9 (10.9)          | 0.424        | 6 (7.6)                               | 6 (11.1)          | 0.933        |
| Ascending aorta replacement plus CABG | 1 (1.2)                                 | 3 (3.9)           | 0.359        | 1 (1.27)                              | 1 (1.85)          | 0.983        |
| Bentall                               | 11 (12.8)                               | 18 (21.9)         | 0.153        | 10 (12.6)                             | 10 (18.5)         | 0.944        |
| CABG plus mitral valve repair         | 0 (0)                                   | 4 (4.8)           | <b>0.055</b> | 0 (0)                                 | 2 (3.7)           | ...          |
| Bioprosthesis mean size (mm)          | 24.1 $\pm$ 2.1                          | 24.5 $\pm$ 1.9    | 0.102        | 24.0 $\pm$ 2.0                        | 24.6 $\pm$ 1.9    | 0.771        |
| <i>Valve size distribution:*</i>      | ...                                     | ...               | 0.050        | ...                                   | ...               | ...          |
| 19                                    | 1 (1.2)                                 | 0 (0.0)           | ...          | 1 (1.3)                               | 0 (0.0)           | -            |
| 21                                    | 10 (11.6)                               | 8 (9.7)           | ...          | 9 (11.4)                              | 5 (9.3)           | 0.664        |
| 23                                    | 36 (41.8)                               | 24 (29.3)         | ...          | 34 (43.0)                             | 16 (29.6)         | 0.380        |
| 25                                    | 23 (26.7)                               | 30 (36.6)         | ...          | 22 (27.8)                             | 18 (33.3)         | 0.421        |
| 27                                    | 12 (13.9)                               | 20 (24.4)         | ...          | 10 (12.7)                             | 15 (27.8)         | ...          |
| 29                                    | 4 (4.6)                                 | 0 (0.0)           | ...          | 3 (3.8)                               | 0 (0.0)           | -            |
| Aortic annulus enlargement            | 9 (10.5)                                | 2 (2.4)           | <b>0.058</b> | 9 (11.4)                              | 1 (1.8)           | <b>0.001</b> |

|                                        |            |            |       |            |            |              |
|----------------------------------------|------------|------------|-------|------------|------------|--------------|
| Intraaortic ballon pump                | 2 (2.33)   | 6 (7.32)   | 0.161 | 1 (1.27)   | 4 (7.41)   | <b>0.026</b> |
| Post-procedural ECMO                   | 1 (1.2)    | 3 (3.7)    | 0.359 | 1 (1.3)    | 1 (1.8)    | 0.921        |
| Mean surgical time (min)               | 275.2±84.1 | 278.8±96.1 | 0.846 | 272.9±84.9 | 255.7±88.6 | 0.085        |
| Mean cardiopulmonary bypass time (min) | 137.1±57.5 | 141.9±67.6 | 0.962 | 134.2±55.8 | 126.7±62.0 | 0.128        |
| Mean aortic cross-clamp time (min)     | 101.0±35.1 | 104.7±45.8 | 0.985 | 95.4±41.3  | 99.3±33.6  | 0.052        |

Continuous variables are presented as mean ± standard deviation; categoric variables are presented as counts and percentage; p-value is a Student t test for continuous variables and a Fisher exact test for categorical variables. Abbreviations: ECMO=extra-corporeal membrane oxygenator; CABG= coronary artery bypass grafting. \*Variables used for propensity score.

**Table S3.** Hospital outcome

|                                     | UNWEIGHTED<br>POPULATION |                 |                 | WEIGHTED<br>POPULATION |                 |                 |
|-------------------------------------|--------------------------|-----------------|-----------------|------------------------|-----------------|-----------------|
|                                     | Trifecta                 | Perimount       | <i>p</i> -value | Trifecta               | Perimount       | <i>p</i> -value |
| 30-day mortality                    | n 86<br>3 (3.5)          | n 82<br>7 (8.5) | 0.203           | n 79<br>2 (2.5)        | n 54<br>4 (7.4) | 0.223           |
| <i>Cause of death:</i>              |                          |                 |                 |                        |                 |                 |
| Multi-organ failure                 | 2                        | 4               | ...             | ...                    | ...             | ...             |
| Heart failure                       | 0                        | 2               | ...             | ...                    | ...             | ...             |
| Haemorrhagic shock (TAAD)           | 0                        | 1               | ...             | ...                    | ...             | ...             |
| Bowel ischemia                      | 1                        | 0               | ...             | ...                    | ...             | ...             |
| Perioperative myocardial infarction | n 86<br>2 (2.3)          | n 81<br>2 (2.5) | 1.000           | n 79<br>1 (1.3)        | n 54<br>1 (1.8) | 0.921           |
| New pacemaker implantation          | n 86<br>1 (1.2)          | n 80<br>2 (2.5) | 0.609           | n 79<br>1 (1.3)        | n 53<br>1 (1.9) | 0.933           |
| Stroke                              | n 86<br>1 (1.2)          | n 80<br>2 (2.5) | 0.609           | n 79<br>1 (1.3)        | n 53<br>1 (1.9) | 0.531           |
| Reoperation for bleeding            | n 86                     | n 80            | <b>0.019</b>    | n 79                   | n 53            | 0.274           |

|                                       |                 |              |              |             |             |                  |
|---------------------------------------|-----------------|--------------|--------------|-------------|-------------|------------------|
|                                       | 8 (9.3)         | 19 (23.7)    |              | 7 (8.8)     | 9 (16.9)    |                  |
| ‡ Acute kidney injury                 | n 86            | n 80         | 0.568        | n 79        | n 53        | 0.598            |
|                                       | 16 (18.6)       | 18 (22.5)    |              | 12 (15.2)   | 8 (15.1)    |                  |
| Continuous veno-venous hemofiltration | n 86            | n 80         | 0.090        | n 79        | n 53        | -                |
|                                       | 2 (2.3)         | 7 (8.7)      |              | 0 (0)       | 3 (5.6)     |                  |
| Respiratory failure                   | n 86            | n 80         | 0.620        | n 79        | n 53        | 0.645            |
|                                       | 8 (9.3)         | 10 (12.5)    |              | 5 (6.3)     | 5 (9.4)     |                  |
| Acute MACCE                           | n 86            | n 82         | 0.196        | n 79        | n 54        | 0.836            |
|                                       | 4 (5)           | 8 (9)        |              | 4 (5)       | 5 (9)       |                  |
| Hospital stay (days)                  | n 86            | n 82         | <b>0.002</b> | n 79        | n 54        | <b>&lt;0.001</b> |
|                                       | 10.5 (IQR:8-14) | 8 (IQR:8-10) |              | 10 (8-14)   | 8 (7-10)    |                  |
| Intensive care unit stay (days)       | n 86            | n 82         | 0.897        | n 79        | n 54        | 0.415            |
|                                       | 1 (IQR:1-2)     | 1 (IQR:1-3)  |              | 1 (IQR:1-2) | 1 (IQR:1-2) |                  |

Continuous variables are presented as mean  $\pm$  standard deviation or the median and quartile; categoric variables are presented as counts and percentage; p-value is a Student t test or Mann Whitney U test for continuous variables and a Fisher exact test for categorical variables. Abbreviations: TAAD=type A aortic dissection. ‡Acute kidney injury is defined according to the KDIGO clinical practice guidelines.

**Table S4.** Valve hemodynamic performance at discharge in the unweighted and weighted populations

|                                                      | UNWEIGHTED<br>POPULATION |                   |                  | WEIGHTED<br>POPULATION |                   |                  |
|------------------------------------------------------|--------------------------|-------------------|------------------|------------------------|-------------------|------------------|
|                                                      | Trifecta                 | Perimount         | <i>p</i> -value  | Trifecta               | Perimount         | <i>p</i> -value  |
| Mean left ventricular ejection fraction (%)          | n 83<br>52±10.6          | n 76<br>52.6±11.2 | 0.773            | n 77<br>52.6±10.6      | n 51<br>52.0±11.8 | 0.908            |
| Mean aortic valve area (cm <sup>2</sup> )            | n 81<br>2.3±0.7          | n 67<br>2.4±0.6   | 0.456            | n 75<br>2.3±0.6        | n 45<br>2.4±0.5   | 0.967            |
| Aortic valve area (cm <sup>2</sup> /m <sup>2</sup> ) | n 81<br>1.2±0.3          | n 67<br>1.2±0.3   | 0.826            | n 75<br>1.2±0.3        | n 45<br>1.2±0.3   | 0.947            |
| <i>Peak pressure gradient (mmHg):</i>                | n 82<br>15.5 ± 6.0       | n 75<br>21.9±8.5  | <b>&lt;0.001</b> | n 76<br>15.6±6.2       | n 50<br>22.7±8.5  | <b>&lt;0.001</b> |
| Size 21                                              | n 9<br>16.3±2.9          | n 5<br>28.8±12.2  | <b>0.011</b>     | n 9<br>16.5±2.6        | n 3<br>34.1±10.9  | <b>0.001</b>     |
| Size 23                                              | n 35<br>18.2±6.8         | n 21<br>23.6±6.9  | <b>0.006</b>     | n 33<br>18.6±6.8       | n 14<br>23.9±5.8  | <b>0.007</b>     |
| Size 25                                              | n 22<br>13.4±4.9         | n 29<br>22.5±9.2  | <b>&lt;0.001</b> | n 21<br>13.9±5.5       | n 18<br>24.6±10.3 | <b>&lt;0.001</b> |
| Size 27                                              | n 12<br>12.6±4.0         | n 20<br>17.5±6.1  | <b>0.018</b>     | n 10<br>11.7±4.6       | n 15<br>18.6±5.5  | <b>0.003</b>     |
| Size 29                                              | n 4<br>9.7±3.1           | -                 | -                | n 3<br>8.1±1.4         | -                 | -                |
| <i>Mean pressure gradient (mmHg):</i>                | n 82<br>7.9±3.2          | n 75<br>12.1±4.7  | <b>&lt;0.001</b> | n 76<br>8.0±3.3        | n 50<br>12.4±4.6  | <b>&lt;0.001</b> |
| Size 21                                              | n 9<br>8.4±2.0           | n 5<br>16.6±6.1   | <b>0.003</b>     | n 9<br>8.4±1.9         | n 3<br>19.7±5.0   | <b>&lt;0.001</b> |
| Size 23                                              | n 35<br>9.2±3.7          | n 21<br>12.8±4.3  | <b>0.001</b>     | n 33<br>9.4±3.7        | n 14<br>13.1±3.4  | <b>0.001</b>     |
| Size 25                                              | n 22<br>7.0±2.6          | n 29<br>12.5±4.9  | <b>&lt;0.001</b> | n 21<br>7.3±3.0        | n 18<br>13.3±5.1  | <b>&lt;0.001</b> |
| Size 27                                              | n 12                     | n 20              | <b>0.012</b>     | n 10                   | n 15              | <b>0.004</b>     |

|                                     |           |           |       |           |           |       |
|-------------------------------------|-----------|-----------|-------|-----------|-----------|-------|
| Size 29                             | 6.5±2.5   | 9.6±3.5   |       | 6.1±2.8   | 10.1±3.3  |       |
|                                     | n 4       | -         | -     | n 3       | -         | -     |
| Moderate paravalvular leak          | 5.0±1.4   |           |       | 4.2±0.5   |           |       |
|                                     | n 83      | n 75      | 1.000 | n 77      | n 50      | 0.646 |
|                                     | 2 (2.4)   | 2 (2.7)   |       | 2 (2.6)   | 2 (4.0)   |       |
| <i>Patient-prosthesis mismatch:</i> | ...       | ...       | 0.437 | ...       | ...       | 0.661 |
| Mild                                | n 81      | n 67      | ...   | n 75      | n 45      | ...   |
|                                     | 19 (23.5) | 17 (25.4) |       | 17 (22.7) | 13 (28.9) |       |
| Moderate and severe                 | n 81      | n 67      | ...   | n 75      | n 45      | ...   |
|                                     | 10 (12.3) | 4 (5.9)   |       | 10 (13.3) | 2 (4.4)   |       |

Continuous variables are presented as mean ± standard deviation; categoric variables are presented as counts and percentage; p-value is a Student t test for continuous variables and a Fisher exact test for categorical variables.

**Table S5.** Valve hemodynamic performance at follow-up in the unweighted and weighted populations

|                                                      | UNWEIGHTED POPULATION |                    |                 | WEIGHTED POPULATION |                    |                 |
|------------------------------------------------------|-----------------------|--------------------|-----------------|---------------------|--------------------|-----------------|
|                                                      | Trifecta              | Perimount          | <i>p</i> -value | Trifecta            | Perimount          | <i>p</i> -value |
| Mean aortic valve area (cm <sup>2</sup> )            | n 14<br>2.1±0.5       | n 8<br>2.3±0.6     | 0.315           | n 14<br>2.1±0.5     | n 7<br>2.4±0.5     | 0.517           |
| Aortic valve area (cm <sup>2</sup> /m <sup>2</sup> ) | n 5<br>1.2±0.3        | n 3<br>0.9±0.1     | 0.166           | n 5<br>1.2±0.3      | n 2<br>1.0±0.1     | 0.139           |
| <i>Peak valve gradient (mmHg):</i>                   | n 80<br>15.4±7.3      | n 73<br>16.7 ± 6.1 | 0.238           | n 75<br>15.5 ± 7.5  | n 49<br>16.5 ± 5.5 | 0.175           |
| Size 21                                              | n 9<br>14.6±5.0       | n 5<br>19.6±6.1    | 0.120           | n 9<br>13.6±5.5     | n 3<br>17.1±2.5    | 0.276           |
| Size 23                                              | n 35<br>18.1±9.1      | n 21<br>16.5±4.7   | 0.477           | n 33<br>18.0±8.5    | n 14<br>16.5±5.6   | 0.484           |
| Size 25                                              | n 21<br>13.6±5.1      | n 28<br>17.2±6.6   | <b>0.043</b>    | n 20<br>13.5±5.2    | n 18<br>18.0±6.1   | <b>0.018</b>    |
| Size 27                                              | n 11<br>13.3±4.6      | n 19<br>15.4±6.7   | 0.354           | n 10<br>14.0±4.5    | n 14<br>15.4±5.9   | 0.543           |
| Size 29                                              | n 4<br>9.7±2.6        | -                  | -               | n 3<br>9.1±2.7      | -                  | -               |
| <i>Mean valve gradient (mmHg):</i>                   | n 80<br>8.2±3.7       | n 74<br>8.9±3.6    | 0.224           | n 75<br>8.2±3.7     | n 49<br>8.8±3.5    | 0.121           |
| Size 21                                              | n 9<br>7.9±2.4        | n 5<br>10.6±2.9    | 0.088           | n 9<br>7.5±2.7      | n 3<br>9.9±2.2     | 0.158           |
| Size 23                                              | n 35<br>9.4±4.5       | n 21<br>8.4±3.2    | 0.376           | n 33<br>9.4±4.2     | n 14<br>8.7±3.9    | 0.579           |
| Size 25                                              | n 21<br>7.0±2.6       | n 29<br>9.5±4.0    | <b>0.017</b>    | n 20<br>6.9±2.7     | n 18<br>10.1±3.7   | <b>0.005</b>    |
| Size 27                                              | n 11<br>7.2±2.6       | n 19<br>7.9±3.4    | 0.528           | n 10<br>7.6±2.8     | n 14<br>7.9±3.2    | 0.812           |

|                             |                 |                 |       |                 |                 |       |
|-----------------------------|-----------------|-----------------|-------|-----------------|-----------------|-------|
| Size 29                     | n 4<br>6.2±2.2  | -               | -     | n 3<br>6.1±2.7  | -               | -     |
| Moderate paravalvular leaks | n 80<br>1 (1.2) | n 74<br>1 (1.3) | 1.000 | n 75<br>1 (1.3) | n 49<br>1 (2.0) | 1.000 |

Continuous variables are presented as mean  $\pm$  standard deviation; categoric variables are presented as counts and percentage; p-value is a Student t test for continuous variables and a Fisher exact test for categorical variables.
