# Supplementary material for: Mid-Term Clinical Outcomes and Hemodynamic Performances of Trifecta and Perimount Bioprostheses following Aortic Valve Replacement
Source: MDPI journal article supplement (doi:10.3390/jcdd10040139), 2023-03-24
Supplement: s1 [file s1]

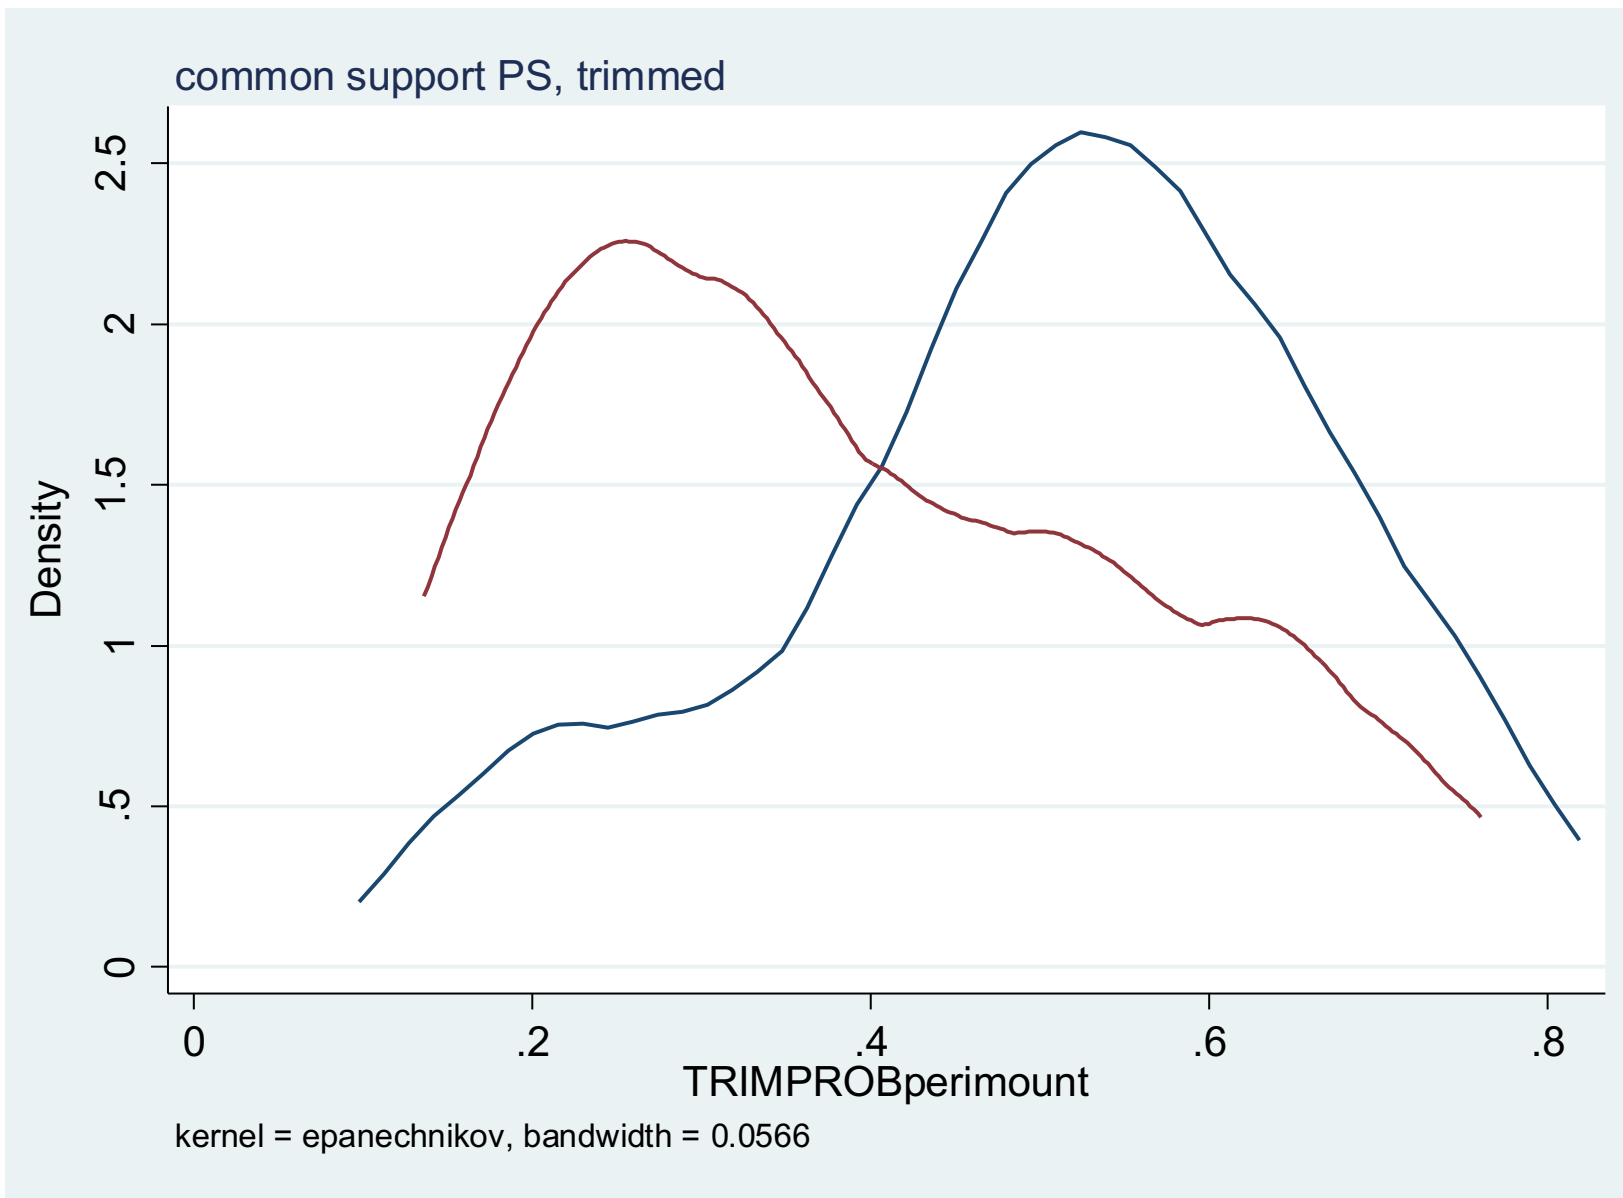

**Supplementary Figure S1:** Distribution of the propensity score by valve. The mean propensity score is 0.39 (SD 0.17) for Trifecta (red line) and 0.51 (SD 0.16) for Perimount (blue line). A large overlap is observed, representing the common support (weighted) population.
